# Supplementary material for: Hazardous base surges of Taal’s 2020 eruption
Source: PubMed Central journal article supplement (PMC8333357; doi:10.1038/s41598-021-94866-2), 2021-08-03
Supplement: 41598_2021_94866_MOESM1_ESM.pdf [file 41598_2021_94866_MOESM1_ESM.pdf]

Legend for supplementary video  
(file name: 13Jan2021\_Vulcanian\_Eruption)

Volcanic activity on 13 January 2020 characterized by a series of discrete, cannon-like explosions that were directed towards the west.
